# Supplementary material
Source: MDPI journal article supplement (https://www.mdpi.com/2071-1050/14/15/9330)
Supplement: s1 [file s1]

**Table S1.** Statistical summary of the experimental data of water samples.

| Parameters                   | Unit               | Initial | Infiltration Distances |       |       |      |       |        |       |      |       |       |       |      |       |       |       |      |
|------------------------------|--------------------|---------|------------------------|-------|-------|------|-------|--------|-------|------|-------|-------|-------|------|-------|-------|-------|------|
|                              |                    |         | 10 cm                  |       |       |      | 30 cm |        |       |      | 50 cm |       |       |      | 80 cm |       |       |      |
|                              |                    |         | Min.                   | Max.  | Avg.  | SD   | Min.  | Max.   | Avg.  | SD   | Min.  | Max.  | Avg.  | SD   | Min.  | Max.  | Avg.  | SD   |
| RHC *                        | -                  | 100%    | 33.0%                  | 60.4% | 39.6% | 8.5% | 22.0% | 50.96% | 31.0% | 9.2% | 14.1% | 42.9% | 23.4% | 9.1% | 11.8% | 37.1% | 19.9% | 8.1% |
| Turbidity                    | NTU                | 38.73   | 8.30                   | 15.73 | 11.28 | 2.54 | 5.82  | 10.64  | 7.82  | 1.64 | 1.96  | 8.82  | 4.50  | 2.31 | 1.21  | 7.91  | 3.44  | 2.27 |
| COD                          | mg L <sup>-1</sup> | 33.65   | 20.50                  | 26.27 | 22.90 | 2.05 | 17.16 | 24.40  | 19.93 | 2.55 | 13.86 | 22.38 | 16.90 | 2.82 | 11.44 | 19.35 | 13.95 | 3.91 |
| NH <sub>4</sub> <sup>+</sup> | mg L <sup>-1</sup> | 52.55   | 34.46                  | 46.80 | 38.05 | 2.95 | 31.33 | 42.55  | 34.59 | 2.49 | 27.21 | 38.42 | 30.95 | 0.06 | 25.91 | 36.59 | 29.22 | 2.49 |
| Mn(IV)                       | mg L <sup>-1</sup> | 0.54    | 0.32                   | 0.45  | 0.37  | 0.05 | 0.30  | 0.43   | 0.35  | 0.04 | 0.20  | 0.39  | 0.25  | 0.06 | 0.16  | 0.37  | 0.24  | 0.06 |
| Mn <sup>2+</sup>             | mg L <sup>-1</sup> | 0.27    | 0.19                   | 0.25  | 0.21  | 0.03 | 0.18  | 0.23   | 0.20  | 0.03 | 0.12  | 0.19  | 0.15  | 0.03 | 0.12  | 0.18  | 0.14  | 0.03 |
| Total Fe                     | mg L <sup>-1</sup> | 38.37   | 29.54                  | 35.03 | 31.51 | 2.07 | 28.94 | 33.58  | 30.82 | 1.77 | 26.56 | 31.60 | 28.36 | 2.07 | 21.07 | 28.83 | 23.45 | 2.83 |
| Fe <sup>3+</sup>             | mg L <sup>-1</sup> | 20.09   | 15.26                  | 18.36 | 16.56 | 1.30 | 14.98 | 17.35  | 16.11 | 1.16 | 13.98 | 16.18 | 14.98 | 0.86 | 10.93 | 14.88 | 12.20 | 1.42 |
| Fe <sup>2+</sup>             | mg L <sup>-1</sup> | 12.50   | 9.80                   | 11.51 | 10.33 | 0.81 | 9.63  | 11.19  | 10.16 | 0.73 | 8.70  | 10.63 | 9.26  | 0.55 | 6.95  | 9.62  | 7.76  | 0.99 |

\* RHC: denotes to relative hydraulic conductivities, which are quotient of the real-time monitoring data ( $K_t$ ) dividing by the initial hydraulic conductivity ( $K_0$ ) of the medium.

**Table S2.** Statistical summary of removal rate of the target water quality parameters during RBF simulation experiment.

| Parameters                   | Infiltration Distances |       |       |       |       |       |       |       |       |       |       |       |       |       |       |       |
|------------------------------|------------------------|-------|-------|-------|-------|-------|-------|-------|-------|-------|-------|-------|-------|-------|-------|-------|
|                              | 10 cm                  |       |       |       | 30 cm |       |       |       | 50 cm |       |       |       | 80 cm |       |       |       |
|                              | Min.                   | Max.  | Avg.  | SD    | Min.  | Max.  | Avg.  | SD    | Min.  | Max.  | Avg.  | SD    | Min.  | Max.  | Avg.  | SD    |
| RHC *                        | 39.6%                  | 66.7% | 60.4% | 0.085 | 48.7% | 78.3% | 69.0% | 0.092 | 56.4% | 85.8% | 76.6% | 0.091 | 63.0% | 88.2% | 80.1% | 0.081 |
| Turbidity                    | 59.4%                  | 78.6% | 70.9% | 0.066 | 72.5% | 85.0% | 79.8% | 0.038 | 77.2% | 94.9% | 88.4% | 0.062 | 79.6% | 96.9% | 91.1% | 0.060 |
| COD                          | 21.9%                  | 39.1% | 31.9% | 0.061 | 27.5% | 49.0% | 40.8% | 0.076 | 33.5% | 58.8% | 49.8% | 0.084 | 42.5% | 66.0% | 58.5% | 0.116 |
| NH <sub>4</sub> <sup>+</sup> | 10.9%                  | 34.4% | 27.6% | 0.056 | 19.0% | 40.4% | 34.2% | 0.047 | 26.9% | 48.2% | 41.1% | 0.048 | 30.4% | 50.7% | 44.4% | 0.047 |
| Mn(IV)                       | 16.8%                  | 41.1% | 33.0% | 0.084 | 21.6% | 44.3% | 36.2% | 0.075 | 27.8% | 63.3% | 53.8% | 0.111 | 31.6% | 70.0% | 56.3% | 0.106 |
| Mn <sup>2+</sup>             | 9.8%                   | 28.7% | 23.4% | 0.098 | 14.6% | 32.8% | 27.2% | 0.100 | 28.8% | 55.8% | 46.8% | 0.116 | 32.8% | 56.6% | 47.8% | 0.113 |
| Total Fe                     | 8.7%                   | 23.0% | 17.9% | 0.054 | 12.5% | 24.6% | 19.7% | 0.046 | 17.6% | 30.8% | 26.1% | 0.050 | 24.9% | 45.1% | 38.9% | 0.074 |
| Fe <sup>3+</sup>             | 8.6%                   | 24.1% | 17.6% | 0.065 | 13.6% | 25.4% | 19.8% | 0.058 | 19.5% | 30.4% | 25.5% | 0.043 | 25.9% | 45.6% | 39.3% | 0.071 |
| Fe <sup>2+</sup>             | 7.9%                   | 21.6% | 17.4% | 0.065 | 10.5% | 22.9% | 18.7% | 0.058 | 15.0% | 30.4% | 26.0% | 0.044 | 23.1% | 44.4% | 37.9% | 0.079 |

\* RHC: denotes to relative hydraulic conductivities, which are quotient of the real-time monitoring data ( $K_t$ ) dividing by the initial hydraulic conductivity ( $K_0$ ) of the medium.

**Table S3.** Correlation matrix of the target water quality parameters.

|                              | <b>Infiltration Distance</b> | <b>Time</b> | <b>Turbidity</b> | <b>NH<sub>4</sub><sup>+</sup></b> | <b>Fe<sup>3+</sup></b> | <b>Fe<sup>2+</sup></b> | <b>Total Fe</b> | <b>Mn(IV)</b> | <b>Mn<sup>2+</sup></b> | <b>COD</b> | <b>Permeability</b> |
|------------------------------|------------------------------|-------------|------------------|-----------------------------------|------------------------|------------------------|-----------------|---------------|------------------------|------------|---------------------|
| Infiltration distance        | 1.000                        |             |                  |                                   |                        |                        |                 |               |                        |            |                     |
| Time                         | 0.082                        | 1.000       |                  |                                   |                        |                        |                 |               |                        |            |                     |
| Turbidity                    | −0.850 **                    | −0.444 *    | 1.000            |                                   |                        |                        |                 |               |                        |            |                     |
| NH <sub>4</sub> <sup>+</sup> | −0.547 *                     | −0.511 *    | 0.098            | 1.000                             |                        |                        |                 |               |                        |            |                     |
| Fe <sup>3+</sup>             | −0.806 **                    | −0.454 *    | 0.337 *          | 0.10                              | 1.000                  |                        |                 |               |                        |            |                     |
| Fe <sup>2+</sup>             | −0.806 **                    | −0.438 *    | 0.408 *          | 0.708                             | −0.595 *               | 1.000                  |                 |               |                        |            |                     |
| Total Fe                     | −0.826 **                    | −0.428 *    | 0.460 *          | 0.702                             | 0.994 **               | 0.987 **               | 1.000           |               |                        |            |                     |
| Mn(IV)                       | −0.699 *                     | −0.541 *    | 0.375 *          | 0.768                             | 0.393 *                | 0.276 *                | 0.307 *         | 1.000         |                        |            |                     |
| Mn <sup>2+</sup>             | −0.686 *                     | −0.496 *    | 0.328 *          | 0.744                             | 0.309 *                | 0.294 *                | 0.219 *         | −0.673 *      | 1.000                  |            |                     |
| COD                          | −0.791 **                    | −0.516 *    | 0.553 *          | 0.799 **                          | 0.882 **               | −0.760 **              | 0.696 **        | 0.919 **      | −0.789 **              | 1.000      |                     |
| RHC ***                      | −0.812 **                    | −0.484 *    | 0.953 **         | 0.755 **                          | 0.803 **               | 0.769 **               | 0.826 **        | 0.882 **      | 0.843 **               | 0.962 **   | 1.000               |

\*:  $p \leq 0.05$ ; \*\*:  $p \leq 0.01$ ; \*\*\* RHC: denotes to relative hydraulic conductivities, which are quotient of the real-time monitoring data ( $K_t$ ) dividing by the initial hydraulic conductivity ( $K_0$ ) of the medium.

**Table S4.** Principal component loadings of the target water quality parameters.

|                              | PC1    | PC2    |
|------------------------------|--------|--------|
| Infiltration distance        | −0.795 | −0.590 |
| Time                         | −0.596 | −0.748 |
| Turbidity                    | 0.883  | −0.004 |
| NH <sub>4</sub> <sup>+</sup> | 0.862  | −0.219 |
| Fe <sup>3+</sup>             | 0.957  | 0.156  |
| Fe <sup>2+</sup>             | 0.95   | 0.177  |
| Total Fe                     | 0.961  | 0.171  |
| Mn(IV)                       | 0.955  | −0.156 |
| Mn <sup>2+</sup>             | 0.952  | −0.175 |
| COD                          | 0.072  | 0.972  |
| Eigenvalue                   | 8.014  | 1.061  |
| % Total variance             | 80.145 | 10.610 |
| Cumulative %                 | 80.145 | 90.755 |

**Table S5.** Statistical summary of removal rate of the target water quality parameters during RBF simulation experiment.

| Parameters                                            | Time Period<br>for Decreasing | Time for<br>Reaching<br>Steady State | Time Period<br>for Increasing | Occurring Position<br>for Parameters<br>Concentration<br>Variation | Interpretation for Concentration Variation                                                                  | Clogging<br>Type  |
|-------------------------------------------------------|-------------------------------|--------------------------------------|-------------------------------|--------------------------------------------------------------------|-------------------------------------------------------------------------------------------------------------|-------------------|
| Turbidity                                             | 0–96 h                        | 96–120 h                             | 120–168 h                     | 0–10 cm                                                            | Physical clogging occurs in whole depth, and mainly in 0–12.5% of infiltration pathway                      | Physical clogging |
| NH <sub>4</sub> <sup>+</sup>                          | 0–96 h                        | 96–120 h                             | 96–144 h                      | 10–30 cm                                                           | Mainly occur in 12.5–37.5% of the infiltration pathway                                                      | Chemical clogging |
| COD                                                   | 0–120 h                       | 120–144 h                            | 144–168 h                     | 10–80 cm                                                           | Mainly occur in 12.5–37.5% of the infiltration pathway                                                      | Chemical clogging |
| Mn(IV) and Mn <sup>2+</sup>                           | 0–120 h                       | 120–144 h                            | 120–144 h,<br>192–216h        | 30–50 cm                                                           | Under the impacts of chemical clogging (redox processes) and dilution at 37.5–62.5% of infiltration pathway | Chemical clogging |
| Fe <sup>3+</sup> , Fe <sup>2+</sup> ,<br>and total Fe | 0–120 h                       | 120–144 h                            | 120–144 h,<br>192–216h        | 50–80 cm                                                           | Under the impacts of chemical clogging (redox processes) and dilution at 62.5–100% of infiltration pathway  | Chemical clogging |

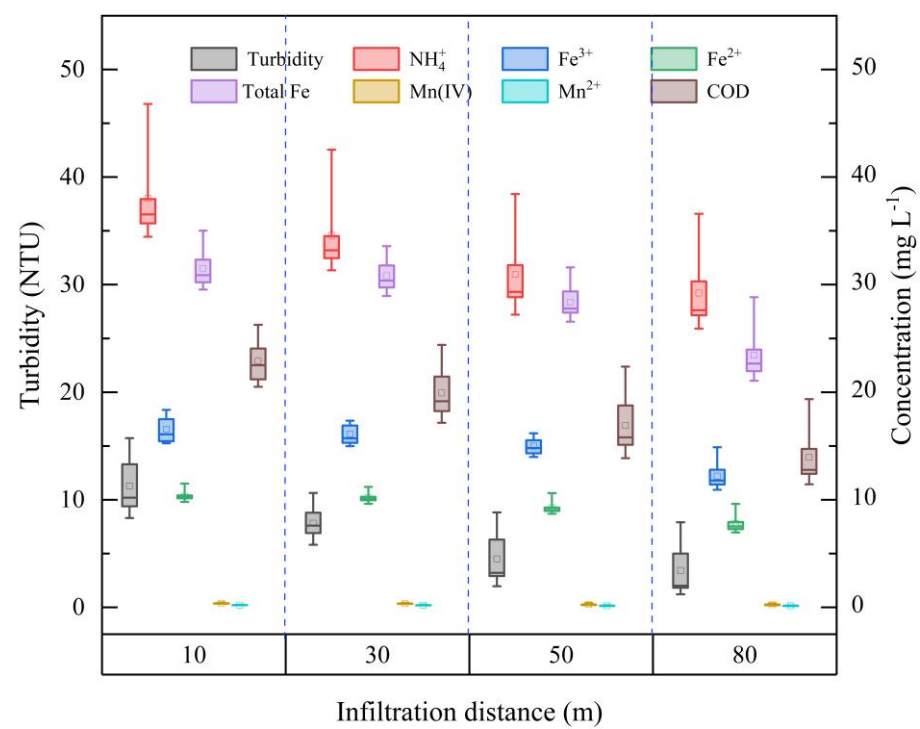

**Figure S1.** The box plot of concentration of target water quality parameters.
